# Supplementary material for: An Algorithm for Curve Identification in the Presence of Curve Intersections
Source: Hindawi journal article supplement (doi:10.1155/2018/7243691), 2018-12-09
Supplement: f1 [file 7243691.f1.zip]

Archive with 11 entries (10 files):
- 7243691.f1/
- 7243691.f1/test1.m
- 7243691.f1/test2.m
- 7243691.f1/test3.m
- 7243691.f1/test4.m
- 7243691.f1/test_eigenvalues.m
- 7243691.f1/workspace1.mat
- 7243691.f1/workspace2.mat
- 7243691.f1/workspace3.mat
- 7243691.f1/workspace4.mat
- 7243691.f1/workspace_eigenvalues.mat
